# Supplementary material for: Transcriptomic, cellular and life-history responses of Daphnia magna chronically exposed to benzotriazoles: Endocrine-disrupting potential and molting effects
Source: PLoS One. 2017 Feb 14;12(2):e0171763. doi: 10.1371/journal.pone.0171763 (PMC5308779; doi:10.1371/journal.pone.0171763)
Supplement: S1 Protocol — (DOCX) [file pone.0171763.s001.docx]

**S1 Protocol. Chemical analyses**

Chemical extraction and analysis of BZTs were realized by Environment Canada’s Quebec Laboratory for Environmental Testing (Montreal, Qc, Canada). The quantification was carried out by internal standard method using 2-methylnaphthalene. Results were corrected for recoveries using spike samples at different levels.

*Sample Extraction*

500 mL water samples were spiked with a methanol solution and mixed for 15 minutes. The samples were liquid-liquid extracted three times with 100, 50 and 50 mL of dichloromethane, respectively, for 2 minutes. Sample extracts were then dried on sodium sulfate. The extracts were concentrated to about 2 mL using a rotary evaporator and transferred into 15 mL conical test tubes. The extracts were further reduced to 0.5 mL under a nitrogen stream.

*GC-HRMS determination*

The GC-MS analysis of benzotriazole, 5-methylbenzotriazole and 5-chlorobenzotriazole was carried out on a 7690 GC (Agilent) coupled to a AutoSpec Premier (Waters). The chromatographic separation was performed on a 60 meters DB5 column (J&W Scientific), 0.25 mm I.D., 0.25 µm phase thichness, fitted with an uncoated fused-silica guard column of 2 m X 0.53 mm I.D. (Restek). The oven temperature was programmed from 100 oC (1 minute) to 210 oC at a rate of 30 oC/min (8 minutes hold time). Helium was used as the carrier gas at 1.5 mL/min. Samples were injected in a Cool-OnColumn injector held at 100 oC for 1 minute then ramped to 320 oC at 100 oC/min. The MS was operated in the electron ionization mode (EI) at 35 eV electron energy. Transfer line and source temperature were set at 275 and 200 oC, respectively. Data were acquired at 10 000 resolution (5% peak height). The quantification was carried out by internal standard method using 2-methylnaphthalene. Results were corrected for recoveries using spike samples at different levels.
